# Supplementary material for: Antioxidant Capacity, Antitumor Activity and Metabolomic Profile of a Beetroot Peel Flour
Source: MDPI journal article supplement (doi:10.3390/metabo13020277), 2023-02-14
Supplement: s1 [file s1]

Supplementary Table S1: Compounds identified in the BPF extract by UHPLC-HRMS using FBMN-GNPS workflow.

| Compound                                   | Ionization module | Chemical Class             | Formula                                        | Molecular Weight (g/mol) | MQScore  | Molecular structure                                                                   |
|--------------------------------------------|-------------------|----------------------------|------------------------------------------------|--------------------------|----------|---------------------------------------------------------------------------------------|
| 2-(4-acetyloxy-3-methoxyphenyl)acetic acid | Positive          | Phenolic acid              | C <sub>11</sub> H <sub>12</sub> O <sub>5</sub> | 224.21                   | 0.744272 | 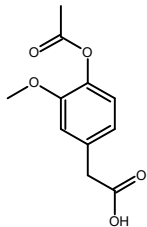   |
| 2,3-dihydroxyflavone                       | Positive          | Flavone                    | C <sub>15</sub> H <sub>10</sub> O <sub>4</sub> | 254.24                   | 0.909874 |    |
| 2,3-quinolinedicarboxylic acid             | Negative          | Quinolines and derivatives | C <sub>11</sub> H <sub>7</sub> NO <sub>4</sub> | 217.18                   | 0.809719 |    |
| 2,4-dihydroxy-4-methoxychalcone            | Negative          | Chalcone                   | C <sub>16</sub> H <sub>14</sub> O <sub>4</sub> | 270.28                   | 0.727163 |   |
| 2,5-dihydroxybenzoic acid                  | Negative          | Phenolic acid              | C <sub>7</sub> H <sub>6</sub> O <sub>4</sub>   | 154.12                   | 0.937293 |  |
| 2-hydroxyflavone                           | Positive          | Flavone                    | C <sub>15</sub> H <sub>10</sub> O <sub>3</sub> | 238.24                   | 0.920667 |  |
| 2-quinolinecarboxylic acid                 | Positive          | Carboxylic acid            | C <sub>10</sub> H <sub>7</sub> NO <sub>2</sub> | 173.17                   | 0.774372 |  |

| Compound                             | Ionization module | Chemical Class                 | Formula                                        | Molecular Weight<br>(g/mol) | MQScore  | Molecular structure                                                                   |
|--------------------------------------|-------------------|--------------------------------|------------------------------------------------|-----------------------------|----------|---------------------------------------------------------------------------------------|
| 3,4,5-trihydroxystilbene             | Negative          | stilbenoid                     | C <sub>14</sub> H <sub>12</sub> O <sub>3</sub> | 228.24                      | 0.729505 | 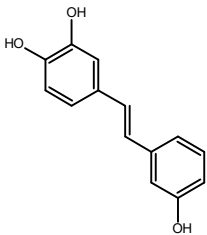   |
| 3,7-dihydroxyflavone                 | Negative          | flavonol                       | C <sub>15</sub> H <sub>10</sub> O <sub>4</sub> | 254.24                      | 0.816893 |    |
| 3-hydroxycinnamic acid               | Negative          | Cinnamic acids and derivatives | C <sub>9</sub> H <sub>8</sub> O <sub>3</sub>   | 164.16                      | 0.727908 |    |
| 4-benzyl-7-hydroxy-3-phenylcoumarin  | Negative          | Isoflavonoids                  | C <sub>22</sub> H <sub>16</sub> O <sub>3</sub> | 328.4                       | 0.762824 |    |
| 4-hydroxy-2-quinolinecarboxylic acid | Negative          | quinoline alkaloid             | C <sub>10</sub> H <sub>7</sub> NO <sub>3</sub> | 189.17                      | 0.893112 |   |
| 4-hydroxy-5,7-dimethoxyflavanone     | Negative          | flavanone                      | C <sub>17</sub> H <sub>16</sub> O <sub>5</sub> | 300.3                       | 0.905707 |  |
| 4-hydroxyflavone                     | Negative          | flavone                        | C <sub>15</sub> H <sub>10</sub> O <sub>3</sub> | 238.24                      | 0.897316 |  |

| Compound                                                                            | Ionization module | Chemical Class             | Formula                                         | Molecular Weight<br>(g/mol) | MQScore  | Molecular structure                                                                   |
|-------------------------------------------------------------------------------------|-------------------|----------------------------|-------------------------------------------------|-----------------------------|----------|---------------------------------------------------------------------------------------|
| 4-quinolinecarboxylic acid                                                          | Negative          | carboxylic acid            | C <sub>10</sub> H <sub>7</sub> NO <sub>2</sub>  | 173.17                      | 0.92021  | 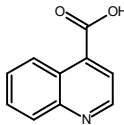   |
| 5,3-dihydroxyflavone                                                                | Negative          | flavone                    | C <sub>15</sub> H <sub>10</sub> O <sub>4</sub>  | 254.24                      | 0.943867 |    |
| 5,7-dihydroxyisoflavone                                                             | Positive          | isoflavone                 | C <sub>15</sub> H <sub>10</sub> O <sub>4</sub>  | 254.24                      | 0.804587 |    |
| 5-Hydroxyindole-3-acetic acid                                                       | Negative          | Indoles and derivatives    | C <sub>10</sub> H <sub>9</sub> NO <sub>3</sub>  | 191.18                      | 0.750671 |    |
| 6,7-dihydroxyflavone                                                                | Negative          | flavone                    | C <sub>15</sub> H <sub>10</sub> O <sub>4</sub>  | 254.24                      | 0.789647 |    |
| 6-hydroxykynurenic acid                                                             | Negative          | Quinolines and derivatives | C <sub>10</sub> H <sub>7</sub> NO <sub>4</sub>  | 205.17                      | 0.72652  |   |
| 6-methoxy-2-oxo-2h-chromen-7-yl 2-o-acetyl-6-o-(6-deoxyhexopyranosyl)hexopyranoside | Negative          | Coumarins and derivatives  | C <sub>24</sub> H <sub>30</sub> O <sub>14</sub> | 542.5                       | 0.796464 |  |

| Compound                              | Ionization module | Chemical Class | Formula                                         | Molecular Weight<br>(g/mol) | MQScore  | Molecular structure                                                                   |
|---------------------------------------|-------------------|----------------|-------------------------------------------------|-----------------------------|----------|---------------------------------------------------------------------------------------|
| 7, 3, 4, 5-tetrahydroxyflavone        | Negative          | flavone        | C <sub>15</sub> H <sub>10</sub> O <sub>6</sub>  | 286.24                      | 0.797703 | 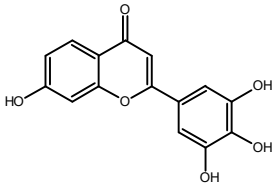   |
| 7,8-dihydroxyflavone                  | Negative          | flavone        | C <sub>15</sub> H <sub>10</sub> O <sub>4</sub>  | 254.24                      | 0.798348 |    |
| 9-methoxy-7h-furo[3,2-g]chromen-7-one | Positive          | coumarin       | C <sub>12</sub> H <sub>8</sub> O <sub>4</sub>   | 216.19                      | 0.718438 |    |
| Aesculin                              | Negative          | coumarin       | C <sub>15</sub> H <sub>16</sub> O <sub>9</sub>  | 340.28                      | 0.915798 |    |
| Apigenin                              | Negative          | flavone        | C <sub>15</sub> H <sub>10</sub> O <sub>5</sub>  | 270.24                      | 0.81928  |   |
| Apigenin-8-c-glucoside                | Negative          | flavone        | C <sub>21</sub> H <sub>20</sub> O <sub>10</sub> | 432.4                       | 0.922017 |  |

| Compound                   | Ionization module | Chemical Class                 | Formula                                                      | Molecular Weight<br>(g/mol) | MQScore  | Molecular structure                                                                   |
|----------------------------|-------------------|--------------------------------|--------------------------------------------------------------|-----------------------------|----------|---------------------------------------------------------------------------------------|
| Caffeic acid               | Negative          | Cinnamic acids and derivatives | C <sub>9</sub> H <sub>8</sub> O <sub>4</sub>                 | 180.16                      | 0.775537 | 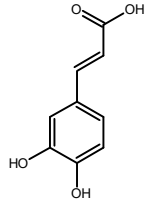   |
| Caffeine                   | Positive          | purine alkaloid                | C <sub>8</sub> H <sub>10</sub> N <sub>4</sub> O <sub>2</sub> | 194.19                      | 0.942158 |    |
| Citric acid                | Negative          | carboxylic acid                | C <sub>6</sub> H <sub>8</sub> O <sub>7</sub>                 | 192.12                      | 0.994374 |    |
| Cyanidin                   | Positive          | anthocyanidin                  | C <sub>15</sub> H <sub>11</sub> O <sub>6</sub> <sup>+</sup>  | 287.24                      | 0.89836  |    |
| Cyanidine-3-o-sambubioside | Negative          | flavonoid 3-O-glucoside        | C <sub>26</sub> H <sub>29</sub> O <sub>15</sub> <sup>+</sup> | 581.5                       | 0.745008 |   |
| Daidzein                   | Negative          | isoflavone                     | C <sub>15</sub> H <sub>10</sub> O <sub>4</sub>               | 254.24                      | 0.809828 |  |

| Compound                     | Ionization module | Chemical Class          | Formula                                                      | Molecular Weight (g/mol) | MQScore  | Molecular structure                                                                   |
|------------------------------|-------------------|-------------------------|--------------------------------------------------------------|--------------------------|----------|---------------------------------------------------------------------------------------|
| Delphinidin-3-o-sambubioside | Negative          | flavonoid 3-O-glucoside | C <sub>26</sub> H <sub>29</sub> O <sub>16</sub> <sup>+</sup> | 597.5                    | 0.750745 | 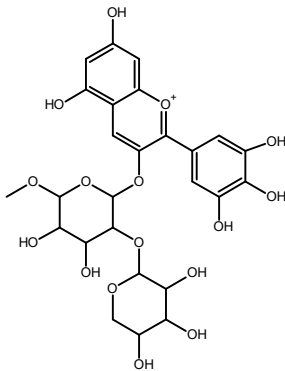   |
| Dianthoside                  | Positive          | glycoside               | C <sub>12</sub> H <sub>16</sub> O <sub>8</sub>               | 288.25                   | 0.902466 |    |
| Ellagic acid                 | Positive          | polyphenol              | C <sub>14</sub> H <sub>6</sub> O <sub>8</sub>                | 302.19                   | 0.770144 |    |
| Epigallocatechin gallate     | Negative          | Flavonoids              | C <sub>22</sub> H <sub>18</sub> O <sub>11</sub>              | 458.4                    | 0.753114 |  |
| Formononetin-7-o-glucoside   | Negative          | Isoflavonoids           | C <sub>22</sub> H <sub>22</sub> O <sub>9</sub>               | 430.4                    | 0.865509 |  |

| Compound         | Ionization module | Chemical Class          | Formula                                                     | Molecular Weight<br>(g/mol) | MQScore  | Molecular structure                                                                   |
|------------------|-------------------|-------------------------|-------------------------------------------------------------|-----------------------------|----------|---------------------------------------------------------------------------------------|
| Galactose        | Negative          | saccharide              | C <sub>6</sub> H <sub>12</sub> O <sub>6</sub>               | 180.16                      | 0.976578 | 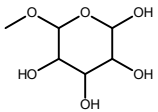   |
| Glucose          | Negative          | saccharide              | C <sub>6</sub> H <sub>12</sub> O <sub>6</sub>               | 180.16                      | 0.808242 |    |
| Indole-3-acetate | Negative          | indole alkaloid         | C <sub>10</sub> H <sub>8</sub> NO <sub>2</sub> <sup>-</sup> | 174.18                      | 0.965575 |    |
| Isocitric acid   | Negative          | carboxylic acid         | C <sub>6</sub> H <sub>8</sub> O <sub>7</sub>                | 192.12                      | 0.80607  |    |
| Isoquercetin     | Negative          | flavonol                | C <sub>21</sub> H <sub>20</sub> O <sub>12</sub>             | 464.4                       | 0.728476 |   |
| Isoquercitrin    | Positive          | flavonoid 3-O-glucoside | C <sub>21</sub> H <sub>20</sub> O <sub>12</sub>             | 464.4                       | 0.946136 |  |

| Compound                                                                           | Ionization module | Chemical Class          | Formula                                         | Molecular Weight<br>(g/mol) | MQScore  | Molecular structure                                                                   |
|------------------------------------------------------------------------------------|-------------------|-------------------------|-------------------------------------------------|-----------------------------|----------|---------------------------------------------------------------------------------------|
| Isorhamnetin 3-galactoside                                                         | Positive          | flavonoid 3-O-glucoside | C <sub>22</sub> H <sub>22</sub> O <sub>12</sub> | 478.4                       | 0.954748 | 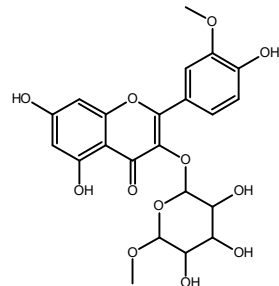   |
| Melilotic acid                                                                     | Negative          | monocarboxylic acid     | C <sub>9</sub> H <sub>10</sub> O <sub>3</sub>   | 166.17                      | 0.813388 |    |
| Melilotoside                                                                       | Positive          | cinnamic acid           | C <sub>15</sub> H <sub>18</sub> O <sub>8</sub>  | 326.3                       | 0.926209 |    |
| Methyl 2-((3-(benzo[d][1,3]dioxol-5-yl)-4-oxo-6-propyl-4h-chromen-7-yl)oxy)acetate | Positive          | isoflavone              | C <sub>22</sub> H <sub>20</sub> O <sub>7</sub>  | 396.4                       | 0.719086 |   |
| Myristic acid                                                                      | Negative          | fat acid                | C <sub>14</sub> H <sub>28</sub> O <sub>2</sub>  | 228.37                      | 0.854644 |  |
| Phlorhizin                                                                         | Negative          | chalcone                | C <sub>21</sub> H <sub>24</sub> O <sub>10</sub> | 436.4                       | 0.803055 |  |



| Compound            | Ionization module | Chemical Class         | Formula                                         | Molecular Weight<br>(g/mol) | MQScore  | Molecular structure                                                                  |
|---------------------|-------------------|------------------------|-------------------------------------------------|-----------------------------|----------|--------------------------------------------------------------------------------------|
| Protocatechuic acid | Positive          | phenolic acid          | C <sub>7</sub> H <sub>6</sub> O <sub>4</sub>    | 154.12                      | 0.809345 | 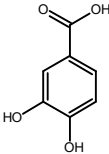  |
| Quinic acid         | Positive          | phenolic acid          | C <sub>7</sub> H <sub>12</sub> O <sub>6</sub>   | 192.17                      | 0.803206 |   |
| Rubiadin            | Negative          | dihydroxyanthraquinone | C <sub>15</sub> H <sub>10</sub> O <sub>4</sub>  | 254.24                      | 0.90528  |   |
| Salsolinol          | Positive          | isoquinoline alkaloid  | C <sub>10</sub> H <sub>13</sub> NO <sub>2</sub> | 179.22                      | 0.844646 |   |
| Salvianolic acid D  | Positive          | cinnamic acid          | C <sub>20</sub> H <sub>18</sub> O <sub>10</sub> | 418.3                       | 0.812422 |   |
| Sanggenon C         | Positive          | chalcone               | C <sub>40</sub> H <sub>36</sub> O <sub>12</sub> | 708.7                       | 0.918472 |  |

| Compound      | Ionization module | Chemical Class | Formula                                         | Molecular Weight<br>(g/mol) | MQScore  | Molecular structure                                                                 |
|---------------|-------------------|----------------|-------------------------------------------------|-----------------------------|----------|-------------------------------------------------------------------------------------|
| Sophoricoside | Positive          | isoflavone     | C <sub>21</sub> H <sub>20</sub> O <sub>10</sub> | 432.4                       | 0.903133 | 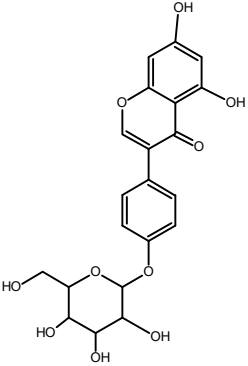 |
| Vitexin       | Negative          | flavone        | C <sub>21</sub> H <sub>20</sub> O <sub>10</sub> | 432.4                       | 0.928021 |  |
| Xanthyletin   | Positive          | coumarin       | C <sub>14</sub> H <sub>12</sub> O <sub>3</sub>  | 228.24                      | 0.815527 |  |
